# Supplementary material for: Effects of Acibenzolar-S-methyl on the Probing Behaviour and Mortality of Cacopsylla pyri on Pear Plants
Source: MDPI journal article supplement (doi:10.3390/insects13060525), 2022-06-06
Supplement: s1 [file s1]

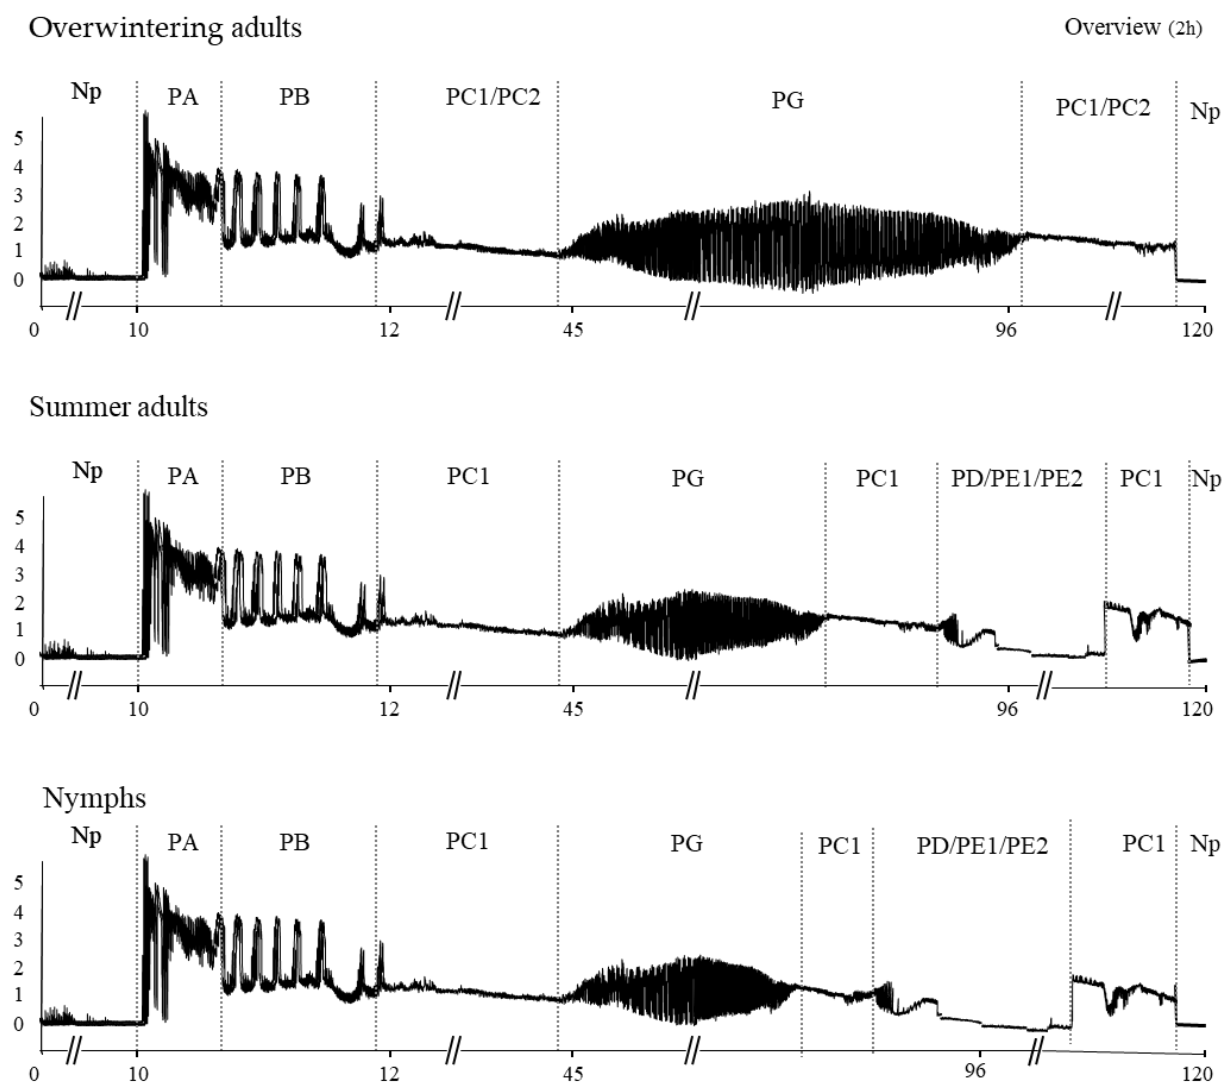

**Supplementary Figure S1.** Schematic representation of typical *C. pyri* probing waveforms for winter- and summer-adults and nymphs. Np: non probing; PA-PB: stylet penetration (sheath salivation); PC1: Parenchyma penetration (sheath salivation); PC2: Vascular parenchyma (unknown activity); PD: Transition to phloem sieve elements; PE1: Sieve element penetration (phloem salivation activity); PE2: Sieve element penetration (phloem ingestion); PG: Xylem vessel penetration (xylem ingestion) [29–31].
